# Supplementary material for: Pregnancy, Birth, Infant, and Early Childhood Neurodevelopmental Outcomes among a Cohort of Women with Symptoms of Zika Virus Disease during Pregnancy in Three Surveillance Sites, Project Vigilancia de Embarazadas con Zika (VEZ), Colombia, 2016–2018
Source: MDPI journal article supplement (doi:10.3390/tropicalmed6040183), 2021-10-12
Supplement: s1 [file s1]

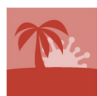

# Supplementary material of Pregnancy, Birth, Infant, and Early Childhood Neurodevelopmental Outcomes among a Cohort of Women with Symptoms of Zika Virus Disease during Pregnancy in Three Surveillance Sites, Project *Vigilancia de Embarazadas con Zika* (VEZ), Colombia, 2016–2018

**Table S1.** Algorithm for classification of Zika virus infection based on Zika virus nucleic acid amplification test (NAAT) results and Zika virus and dengue virus immunoglobulin M (IgM) test results, Project *Vigilancia de Embarazadas con Zika* (VEZ), Colombia, 2016 – 2018.

1. If Zika virus NAAT\* of maternal serum or urine, amniotic fluid, umbilical cord tissue, placental tissue, or fetal tissue was positive, regardless of Zika virus IgM test results, then the pregnancy was considered to have **confirmed** Zika virus infection.
2. If Zika virus NAAT\* of maternal serum or urine, amniotic fluid, umbilical cord tissue, placental tissue, or fetal tissue was negative or not performed, but maternal or fetal Zika virus IgM test results were positive and dengue virus IgM<sup>†</sup> test results were negative, then the pregnancy was considered to have **presumptive** Zika virus infection.
3. If all Zika virus NAAT\* of maternal serum or urine, amniotic fluid, umbilical cord tissue, placental tissue, or fetal tissue

\* The interval between symptom onset and NAAT was often prolonged.

<sup>†</sup> Dengue virus IgM was only performed on Zika virus IgM positive samples.

**Table S2.** Clinical details of 50 fetuses and infants with Zika-associated birth defects including microcephaly only at birth, and 17 infants with postnatal-onset microcephaly, Project *Vigilancia de Embarazadas con Zika* (VEZ), Colombia, 2016–2018.

| Case | Trimester of maternal Zika virus (ZIKV) symptoms   | Gestational age at delivery in weeks | Growth parameters at birth*: |                        | Main neuroimaging type and findings                                                                                                                  | Neurodevelopmental sequelae                                                           | Escala Abreviada del Desarrollo Alerts (age range and domain of alert noted) | Other findings                                       |
|------|----------------------------------------------------|--------------------------------------|------------------------------|------------------------|------------------------------------------------------------------------------------------------------------------------------------------------------|---------------------------------------------------------------------------------------|------------------------------------------------------------------------------|------------------------------------------------------|
|      |                                                    |                                      | HC, cm (percentile)          | Weight, g (percentile) |                                                                                                                                                      |                                                                                       |                                                                              |                                                      |
| 1    | Second trimester<br><br>Presumptive ZIKV infection | 37 weeks                             | HC: 33 (49.4)                |                        |                                                                                                                                                      | Eye/vision: normal                                                                    |                                                                              |                                                      |
|      |                                                    | Male                                 | Weight: 2800 (40.8)          |                        | Not available                                                                                                                                        | Hearing: Not available                                                                | No alerts in developmental screening                                         | No additional findings                               |
|      |                                                    | Live birth                           | Length: 49 (74.7)            |                        |                                                                                                                                                      | Neurologic: Microcephaly in infant follow-up                                          |                                                                              |                                                      |
| 2    | No ZIKV testing available                          | 38 weeks                             | HC: 34 (80)                  |                        |                                                                                                                                                      | Eye/vision: Not available                                                             |                                                                              |                                                      |
|      |                                                    | Female                               | Weight: 3640 (94.3)          |                        | Not available                                                                                                                                        | Hearing: Not available                                                                | Not available                                                                | No additional findings                               |
|      |                                                    | Live birth                           | Length: 51 (96.6)            |                        |                                                                                                                                                      | Neurologic: Microcephaly in infant follow-up                                          |                                                                              |                                                      |
| 3    | Third trimester<br><br>Presumptive ZIKV infection  |                                      |                              |                        | Prenatal US: Ventriculomegaly, intracranial calcifications, microcephaly, abnormal cortical gyral patterns                                           |                                                                                       | Gross motor alert (6-11 & 12-17 months)                                      |                                                      |
|      |                                                    | 36 weeks                             | HC: 28 (0.04)                |                        | Cranial US: Thin cortical mantle, ventriculomegaly,                                                                                                  | Eye/vision: Normal                                                                    | Fine motor alert (6-11 & 12-17 months)                                       |                                                      |
|      |                                                    | Male                                 | Weight: 2420 (24.7)          |                        | intraventricular calcifications,                                                                                                                     | Hearing: Not available                                                                | Hearing and language alert (6-11 & 12-17 months)                             | Cryptorchidism                                       |
|      |                                                    | Live birth                           | Length: 48 (71.3)            |                        | absent corpus callosum                                                                                                                               | Neurologic: Microcephaly at birth and infant follow-up, seizures, increased body tone | Personal and social alert (6-11 & 12-17 months)                              | Prominent occipital bone, craniofacial disproportion |
|      |                                                    |                                      |                              |                        | Cranial CT: Microcephaly, calcifications in frontal and parietal lobes and cerebellum thinning of the cerebral cortex in frontal lobe, absent corpus |                                                                                       |                                                                              |                                                      |

|   |                                                |                                  |                        |                                                                                                                              |                                                                                                                                                     |                                                                 |  |                                                                                                                      |
|---|------------------------------------------------|----------------------------------|------------------------|------------------------------------------------------------------------------------------------------------------------------|-----------------------------------------------------------------------------------------------------------------------------------------------------|-----------------------------------------------------------------|--|----------------------------------------------------------------------------------------------------------------------|
|   |                                                |                                  |                        |                                                                                                                              | callosum,<br>absent cerebral<br>sulci, probable<br>lissencephaly,<br>dilated lateral<br>and posterior<br>ventricular<br>horns<br>(ventriculomegaly) |                                                                 |  |                                                                                                                      |
| 4 | First trimester                                |                                  | HC: 31 (0.29)          | <b>Prenatal US:</b><br>Intracranial<br>calcifications                                                                        |                                                                                                                                                     |                                                                 |  |                                                                                                                      |
|   | No laboratory<br>evidence of ZIKV<br>infection | 41 weeks<br>Female<br>Live birth | Weight: 3520<br>(64.3) | <b>Brain MRI:</b><br>Microcephaly<br>Cortical<br>thinning,<br>gliosis in white<br>matter,<br>periventricular<br>leukomalacia | <b>Eye/vision:</b> Possible<br>visual impairment<br>(bilateral strabismus)                                                                          | Gross motor alert (0-5,<br>6-11, 12-17, & 18-24<br>months)      |  |                                                                                                                      |
|   |                                                |                                  | Length: 50<br>(56.5)   | <b>Cranial US:</b><br>Normal                                                                                                 | <b>Hearing:</b> Normal exam                                                                                                                         | Fine motor alert (6-11,<br>12-17, & 18-24 months)               |  | Narrow forehead,<br>extra skin on head,<br>craniofacial disproportion,<br>absent frenulum,<br>prominent frontal bone |
|   |                                                |                                  |                        | <b>Cranial CT:</b><br>Multiple<br>intracranial<br>calcifications in<br>frontal and<br>parietal lobes                         | <b>Neurologic:</b><br>Microcephaly at birth<br>and follow up,<br>seizures, swallowing<br>difficulty                                                 | Hearing and language<br>alert (6-11, 12-17, & 18-<br>24 months) |  |                                                                                                                      |
| 5 | First trimester                                |                                  | HC: 30<br>(0.09)       |                                                                                                                              | <b>Eye/vision:</b> Not<br>available                                                                                                                 |                                                                 |  |                                                                                                                      |
|   | Confirmed ZIKV<br>infection                    | 39 weeks<br>Male<br>Live birth   | Weight: 2345<br>(1.4)  | <b>Cranial US:</b><br>Normal                                                                                                 | <b>Hearing:</b> Not available                                                                                                                       | Not available                                                   |  | SGA                                                                                                                  |
|   |                                                |                                  | Length: 48<br>(21.8)   |                                                                                                                              | <b>Neurologic:</b><br>Microcephaly                                                                                                                  |                                                                 |  |                                                                                                                      |
| 6 | Second trimester                               | 40 weeks                         | HC: 32 (5.12)          |                                                                                                                              | <b>Eye/vision:</b> Normal                                                                                                                           |                                                                 |  |                                                                                                                      |
|   | Confirmed ZIKV<br>infection                    | Female                           | Weight: 2290<br>(0.62) | <b>Cranial US:</b><br>Normal                                                                                                 | <b>Hearing:</b> Normal                                                                                                                              |                                                                 |  |                                                                                                                      |
|   |                                                | Live birth                       | Length: 41<br>(0.00)   |                                                                                                                              | <b>Neurologic:</b><br>Microcephaly in infant<br>follow-up, tone<br>abnormalities.<br>Microcephaly                                                   | Gross motor alert (18-<br>24 months)                            |  | SGA                                                                                                                  |
| 7 | Second trimester                               | 38 weeks                         | HC: no data            |                                                                                                                              | <b>Eye/vision:</b> not<br>available                                                                                                                 |                                                                 |  |                                                                                                                      |
|   | No ZIKV testing<br>results                     | Male                             | Weight: 2800<br>(24.3) | Not available                                                                                                                | <b>Hearing:</b> normal                                                                                                                              | Not available                                                   |  | No additional findings                                                                                               |
|   |                                                | Live birth                       | Length: 47<br>(17.6)   |                                                                                                                              | <b>Neurologic:</b><br>microcephaly in infant<br>follow-up                                                                                           |                                                                 |  |                                                                                                                      |
| 8 | First trimester                                | 40 weeks                         | HC: 35 (72.6)          |                                                                                                                              | <b>Eye/vision:</b> Not<br>available                                                                                                                 |                                                                 |  |                                                                                                                      |
|   | Presumptive<br>ZIKV infection                  | Male                             | Weight: 2940<br>(12.8) | <b>Cranial US:</b><br>Ventriculomegaly                                                                                       | <b>Hearing:</b> Not available                                                                                                                       | Not available                                                   |  | Not available                                                                                                        |
|   |                                                | Live birth                       |                        |                                                                                                                              |                                                                                                                                                     |                                                                 |  |                                                                                                                      |

|    |                               |            |                          |                                                                                                                                                                                                                                         |                                                                                                                                                        |                                                                                                      |                                                                                                                                 |  |
|----|-------------------------------|------------|--------------------------|-----------------------------------------------------------------------------------------------------------------------------------------------------------------------------------------------------------------------------------------|--------------------------------------------------------------------------------------------------------------------------------------------------------|------------------------------------------------------------------------------------------------------|---------------------------------------------------------------------------------------------------------------------------------|--|
|    |                               |            | Length: 48<br>(11.9)     |                                                                                                                                                                                                                                         | Neurologic: Not<br>available                                                                                                                           |                                                                                                      |                                                                                                                                 |  |
| 9  | First trimester               | 36 weeks   | HC: 31 (10.97)           | <b>Prenatal US:</b><br>IUGR,<br>microcephaly,<br>colpocephaly,<br>bilateral<br>ventriculomegaly, Dandy<br>Walker<br>anomaly, Blake<br>pouch cyst,<br>bilateral talipes<br>equinovarus                                                   | <b>Eye/vision:</b> Not<br>available                                                                                                                    | Not available                                                                                        | Short neck, pectus<br>excavatum, hip dystocia,<br>overlapping toes, talipes<br>equinovarus.<br>Infant died at 12 days of<br>age |  |
|    | Presumptive<br>ZIKV infection | Male       | Weight: 2315<br>(17.1)   |                                                                                                                                                                                                                                         | <b>Hearing:</b> Not available                                                                                                                          |                                                                                                      |                                                                                                                                 |  |
|    |                               | Live birth | Length: 46<br>(29.7)     |                                                                                                                                                                                                                                         | <b>Neurologic:</b> Not<br>available                                                                                                                    |                                                                                                      |                                                                                                                                 |  |
|    |                               |            |                          |                                                                                                                                                                                                                                         |                                                                                                                                                        |                                                                                                      |                                                                                                                                 |  |
| 10 | First Trimester               | 40 weeks   | HC: 28(0.00)             | <b>Prenatal US:</b><br>Microcephaly,<br>ventriculomegaly,<br>periventricular<br>calcifications,<br>abnormal<br>corpus<br>callosum                                                                                                       | <b>Eye/vision:</b> Abnormal<br>retinal pigment                                                                                                         | Gross motor alert (6-11,<br>12-17, & 18-24 months)                                                   |                                                                                                                                 |  |
|    | No ZIKV testing<br>results    | Female     | Weight: 2900<br>(16.9)   | <b>Cranial CT:</b><br>Ventriculomegaly, possible<br>dysgenesis of<br>corpus<br>callosum                                                                                                                                                 | <b>Hearing:</b> Not available                                                                                                                          | Fine motor alert (6-11,<br>12-17, & 18-24 months)                                                    |                                                                                                                                 |  |
|    |                               | Live birth | Length: 49<br>(44.1)     |                                                                                                                                                                                                                                         | <b>Neurologic:</b><br>Microcephaly at birth<br>and follow-up,<br>swallowing difficulty,<br>seizures, increased<br>body tone, movement<br>abnormalities | Hearing and language<br>alert (6-11, 12-17, & 18-<br>24 months)                                      |                                                                                                                                 |  |
|    |                               |            |                          |                                                                                                                                                                                                                                         |                                                                                                                                                        | Personal and social<br>alert (6-11, 12-17, & 18-<br>24 months)                                       |                                                                                                                                 |  |
|    |                               |            |                          |                                                                                                                                                                                                                                         |                                                                                                                                                        | <b>Brain MRI:</b><br>Thin cortical<br>mantle, ex<br>vacuo<br>enlargement of<br>lateral<br>ventricles |                                                                                                                                 |  |
|    |                               |            |                          |                                                                                                                                                                                                                                         | Asymmetric cranium                                                                                                                                     |                                                                                                      |                                                                                                                                 |  |
| 11 | Periconception                | 34 weeks   | HC: 33(92.4)             | <b>Cranial CT:</b><br>Dysgenesis of<br>the corpus<br>callosum, and<br>periventricular<br>calcifications.<br>Ventriculomegaly                                                                                                            | <b>Eye/vision:</b> Normal                                                                                                                              | Not available                                                                                        | Infant positive and<br>amniotic fluid +                                                                                         |  |
|    | No ZIKV testing<br>results    | Female     | Weight: not<br>available |                                                                                                                                                                                                                                         | <b>Hearing:</b> Not available                                                                                                                          |                                                                                                      |                                                                                                                                 |  |
|    |                               | Live birth | Length: not<br>available |                                                                                                                                                                                                                                         | <b>Neurologic:</b> Not<br>available                                                                                                                    |                                                                                                      |                                                                                                                                 |  |
|    |                               |            |                          |                                                                                                                                                                                                                                         |                                                                                                                                                        |                                                                                                      |                                                                                                                                 |  |
| 12 | First trimester               |            | HC: Not<br>available     | <b>Prenatal US:</b><br>Microcephaly,<br>closure of<br>anterior and<br>posterior<br>fontanels<br>(craniosynostosis),<br>hypoechogenicity and<br>reduction of<br>the frontal lobe<br>of the brain<br>(hypoplasia),<br>microcalcifications | <b>Eye/vision:</b> Retinal<br>calcifications                                                                                                           | Not available                                                                                        | Hypogonadism,<br>dysmorphic features,<br>craniosynostosis                                                                       |  |
|    | Confirmed ZIKV<br>infection   | 28 weeks   | Weight: 1270<br>(80.9)   | <b>Hearing:</b> Not available                                                                                                                                                                                                           | <b>Neurologic:</b> Not<br>available                                                                                                                    |                                                                                                      | Infant died on date of birth                                                                                                    |  |
|    |                               | Male       |                          |                                                                                                                                                                                                                                         |                                                                                                                                                        |                                                                                                      | Infant brain tissue<br>pathology evaluation:<br>thinning of the cerebral<br>cortex with apoptosis and<br>microcalcifications    |  |
|    |                               | Live birth | Length: 38<br>(60.7)     |                                                                                                                                                                                                                                         |                                                                                                                                                        |                                                                                                      |                                                                                                                                 |  |
|    |                               |            |                          |                                                                                                                                                                                                                                         |                                                                                                                                                        |                                                                                                      |                                                                                                                                 |  |

|    |                                          |               |                     |                                                                                                                                                                           |                                                                                                                  |                                                          |                                                                                                  |
|----|------------------------------------------|---------------|---------------------|---------------------------------------------------------------------------------------------------------------------------------------------------------------------------|------------------------------------------------------------------------------------------------------------------|----------------------------------------------------------|--------------------------------------------------------------------------------------------------|
|    |                                          |               |                     | <b>Cranial US:</b><br>Cerebral atrophy, intracranial calcifications, hypoplasia of frontal lobe, vasculitis                                                               |                                                                                                                  |                                                          |                                                                                                  |
| 13 | First trimester                          | 36 weeks Male | HC: 29 (0.36)       | <b>Cranial US:</b><br>Intracranial calcifications (periventricular and subcortical), dysgenesis of corpus callosum, abnormal gyri, ventriculomegaly                       | <b>Eye/vision:</b><br>Microcornea, chorioretinal lesions extramacular scar in left eye. Nystagmus and strabismus | Gross motor alert (6-11, 12-17, & 18-24 months)          |                                                                                                  |
|    | No ZIKV testing results                  | Live birth    | Weight: 2400 (23.2) | <b>Cranial CT:</b><br>Increased ventricular size especially of posterior horns. Cortico-subcortical and basal ganglia calcifications, absent sulci, thin cerebral cortex. | <b>Hearing:</b> Normal evaluation                                                                                | Fine motor alert (6-11, 12-17, & 18-24 months)           | Narrow forehead, overlapped sutures, extra skin folds on neck, high arched palate, micrognathia, |
|    |                                          |               | Length: 46 (29.7)   | <b>Neurologic:</b><br>Microcephaly at birth and follow-up, seizures, tone and movement abnormalities, swallowing difficulties                                             |                                                                                                                  | Hearing and language alert (6-11, 12-17, & 18-24 months) |                                                                                                  |
|    |                                          |               |                     | <b>Brain MRI:</b><br>Simplified gyral pattern, ventriculomegaly, agenesis of corpus callosum                                                                              |                                                                                                                  |                                                          |                                                                                                  |
| 14 | First trimester                          | 35 weeks Male | HC: 30 (5.95)       | <b>Prenatal US:</b><br>Ventriculomegaly, megacisterna magna, probable dysgenesis of the corpus callosum                                                                   | <b>Eye/vision:</b> Abnormal retinal pigment, optic nerve hypoplasia                                              | Gross motor alert (6-11, 12-17, & 18-24 months)          |                                                                                                  |
|    | No laboratory evidence of ZIKV infection | Live birth    | Weight: 2465 (48.9) | <b>Brain MRI:</b><br>Thin cortical mantle, thin corpus callosum, ventriculomegaly,                                                                                        | <b>Hearing:</b> Normal                                                                                           | Fine motor alert (6-11, 12-17, & 18-24 months)           | Abnormal appearance of head                                                                      |
|    |                                          |               | Length: 46 (49.5)   |                                                                                                                                                                           | <b>Neurologic:</b><br>Microcephaly in infant follow-up, seizures, tone abnormality, movement abnormality         | Hearing and language alert (6-11, 12-17, & 18-24 months) |                                                                                                  |
|    |                                          |               |                     |                                                                                                                                                                           |                                                                                                                  | Personal and social alert (6-11, 12-17, & 18-24 months)  |                                                                                                  |
| 15 | First trimester                          | 28 weeks Male | HC: 23 (3.19)       | <b>Prenatal US:</b><br>Ventriculomegaly, talipes equinovarus                                                                                                              | <b>Eye/vision:</b> Not available                                                                                 | Not available                                            | Club foot, esophageal atresia, abnormal facies, pulmonary malformations                          |

|    |                                          |                   |                       |                                                                                                                                                                                                                                                                                                                                                                                                                                                                                                                            |                                                                                                                                   |                                                          |                                                                                                                                                     |
|----|------------------------------------------|-------------------|-----------------------|----------------------------------------------------------------------------------------------------------------------------------------------------------------------------------------------------------------------------------------------------------------------------------------------------------------------------------------------------------------------------------------------------------------------------------------------------------------------------------------------------------------------------|-----------------------------------------------------------------------------------------------------------------------------------|----------------------------------------------------------|-----------------------------------------------------------------------------------------------------------------------------------------------------|
|    | No laboratory evidence of ZIKV infection |                   | Weight: 910 (19.7)    |                                                                                                                                                                                                                                                                                                                                                                                                                                                                                                                            | <b>Hearing:</b> Not available                                                                                                     |                                                          | Infant death                                                                                                                                        |
|    |                                          |                   | Length: 33 (4.93)     |                                                                                                                                                                                                                                                                                                                                                                                                                                                                                                                            | <b>Neurologic:</b> Not available                                                                                                  |                                                          |                                                                                                                                                     |
|    |                                          |                   | HC: Not available     |                                                                                                                                                                                                                                                                                                                                                                                                                                                                                                                            | <b>Eye/vision:</b> Not available                                                                                                  |                                                          |                                                                                                                                                     |
| 16 | First trimester                          | 39 weeks          | Weight: Not available | Not available                                                                                                                                                                                                                                                                                                                                                                                                                                                                                                              | <b>Hearing:</b> Not available                                                                                                     | No alerts in developmental screening                     | No additional findings                                                                                                                              |
|    | No laboratory available                  | Female            |                       |                                                                                                                                                                                                                                                                                                                                                                                                                                                                                                                            |                                                                                                                                   |                                                          |                                                                                                                                                     |
|    |                                          | Live birth        | Length: Not available |                                                                                                                                                                                                                                                                                                                                                                                                                                                                                                                            | <b>Neurologic:</b> microcephaly in infant follow-up                                                                               |                                                          |                                                                                                                                                     |
| 17 | First trimester                          | 38 weeks          | HC: 30 (0.28)         | <b>Brain MRI:</b><br>Hypoplasia of corpus callosum, cerebral atrophy, ventriculomegaly, lissencephaly<br><br><b>Cranial CT:</b><br>Decrease size of cranial vault, dilatation of the supra and infratentorial ventricular systems, decrease of cortical trails in relation to atrophic changes associated with cortical immaturity, discrete decrease in the differentiation of gray and white matter, mega-cisterna magna-like variant, brain atrophy, areas of lissencephaly and pachygyria, hypoplastic corpus callosum | <b>Eye/vision:</b> Bilateral pale and hypoplastic optic nerves, bilateral abnormal retinal pigment dispersion, vision impairment  | Gross motor alert (6-11, 12-17, & 18-24 months)          | Non-palpable fontanelles, overlapping sutures, low set ear (left), narrow forehead, high arched palate, micrognathia, mildly depressed nasal bridge |
|    | No laboratory evidence of ZIKV infection | Male              | Weight: 2800 (24.2)   |                                                                                                                                                                                                                                                                                                                                                                                                                                                                                                                            | <b>Hearing:</b> Normal evaluation                                                                                                 | Fine motor alert (6-11, 12-17, & 18-24 months)           |                                                                                                                                                     |
|    |                                          | Live birth        | Length: 51 (91.5)     |                                                                                                                                                                                                                                                                                                                                                                                                                                                                                                                            | <b>Neurologic:</b> Microcephaly at birth and follow-up, seizures, movement abnormality, tone abnormality, swallowing difficulties | Hearing and language alert (6-11, 12-17, & 18-24 months) |                                                                                                                                                     |
| 18 | Periconception                           | 39 weeks          | HC: 28 (0.00)         | <b>Cranial US:</b> Ventriculomegaly                                                                                                                                                                                                                                                                                                                                                                                                                                                                                        | <b>Eye/vision:</b> Not available.                                                                                                 |                                                          |                                                                                                                                                     |
|    | Presumptive ZIKV infection               | Female Live birth | Weight: 2400 (2.62)   | <b>Cranial CT:</b> Microcephaly,                                                                                                                                                                                                                                                                                                                                                                                                                                                                                           | <b>Hearing:</b> Not available                                                                                                     | Not available                                            | SGA                                                                                                                                                 |
|    |                                          |                   |                       |                                                                                                                                                                                                                                                                                                                                                                                                                                                                                                                            | <b>Neurologic:</b> Microcephaly                                                                                                   |                                                          |                                                                                                                                                     |

|    |                            |                                                    |                                                |                                                                                                                                  |                                                                                                                 |                                                               |                                                                                                                        |
|----|----------------------------|----------------------------------------------------|------------------------------------------------|----------------------------------------------------------------------------------------------------------------------------------|-----------------------------------------------------------------------------------------------------------------|---------------------------------------------------------------|------------------------------------------------------------------------------------------------------------------------|
|    |                            |                                                    | Length: 44 (0.42)                              | cerebral atrophy, ventriculomegaly, intracranial calcifications, (subcortical), absent cavum septum pellucidum, cortical atrophy |                                                                                                                 |                                                               |                                                                                                                        |
| 19 | First trimester            | 37 weeks Male<br>Live birth                        | HC: 32 (20.03)                                 | <b>Cranial US:</b> Parenchymal calcifications, small cerebellum                                                                  | <b>Eye/vision:</b> Normal                                                                                       | Gross motor alert (0-5, 6-11, 12-17, & 18-24 months)          | No additional findings                                                                                                 |
|    | Presumptive ZIKV infection |                                                    | Weight: 2810 (41.8)                            | <b>Cranial CT:</b> Intracranial calcifications                                                                                   | <b>Hearing:</b> Normal                                                                                          | Fine motor alert (0-5, 6-11, 12-17, & 18-24 months)           |                                                                                                                        |
|    |                            |                                                    | Length: 47 (32.0)                              | <b>Brain MRI:</b> Bilateral atrophy of the frontal lobes, right frontal polymicrogyria                                           | <b>Neurologic:</b> Microcephaly in infant follow-up swallowing abnormality, tone abnormality, seizures movement | Hearing and language alert (0-5, 6-11, 12-17, & 18-24 months) |                                                                                                                        |
|    |                            |                                                    |                                                |                                                                                                                                  |                                                                                                                 | Personal and social alert (0-5, 6-11, 12-17, & 18-24 months)  |                                                                                                                        |
| 20 | First trimester            | 33 weeks Female<br>Live birth                      | HC: 26 (0.10)                                  | <b>Cranial US:</b> Intracranial calcifications bilateral, mild ventricular dilatation                                            | <b>Eye/vision:</b> Retinopathy, bilateral eye proptosis, chorioretinitis in macula,                             |                                                               | Dysmorphic features, missing a phalange in 5th finger left hand, bilateral camptodactyly, simian crease, low set ears. |
|    | Presumptive ZIKV infection |                                                    | Weight: 1105 (1.66)                            |                                                                                                                                  | <b>Hearing:</b> Not available                                                                                   | Not available                                                 |                                                                                                                        |
|    |                            |                                                    | Length: 38 (0.37)                              |                                                                                                                                  | <b>Neurologic:</b> Microcephaly, arthrogryposis, clenched hands and right upper limb hemiparesis, seizures      |                                                               | Infant died at 4 months of age<br>SGA                                                                                  |
| 21 | Second trimester           | 22 weeks<br>Infant sex not available<br>Fetal loss | HC: Not available                              | <b>Prenatal US:</b> Ventriculomegaly, corpus callosum abnormality, cerebral atrophy, Alobar holoprosencephaly†                   | <b>Eye/vision:</b> Not available                                                                                |                                                               |                                                                                                                        |
|    | Confirmed ZIKV infection   |                                                    | Weight: Not available<br>Length: Not available |                                                                                                                                  | <b>Hearing:</b> Not available<br><b>Neurologic:</b> Not available                                               | Not available                                                 | Not available                                                                                                          |
| 22 | Third trimester            | 37 weeks<br>Female<br>Live birth                   | HC: not available                              |                                                                                                                                  | <b>Eye/vision:</b> Not available                                                                                | Gross motor alert (6-11 & 12-17 months)                       | SGA                                                                                                                    |
|    | No ZIKV testing results    |                                                    | Weight: 1900 (0.81)<br>Length: 44 (2.98)       | Not available                                                                                                                    | <b>Hearing:</b> Not available<br><b>Neurologic:</b> Postnatal microcephaly                                      | Fine motor alert (12-17 months)                               |                                                                                                                        |
| 23 | First trimester            | 37 weeks Male                                      | HC: 38 (99.9)                                  | <b>Brain MRI:</b> Intracranial calcifications,                                                                                   | <b>Eye/vision:</b> Not available                                                                                | Not available                                                 | Not available                                                                                                          |

|    |                         |                      |                                          |                                                         |                                                                                      |                                                                                                                          |                        |
|----|-------------------------|----------------------|------------------------------------------|---------------------------------------------------------|--------------------------------------------------------------------------------------|--------------------------------------------------------------------------------------------------------------------------|------------------------|
|    | No ZIKV testing results | Live birth           | Weight: 3620 (95.0)<br>Length: 49 (74.7) | cerebral cortical atrophy, prominent subarachnoid space | <b>Hearing:</b> Not available<br><b>Neurologic:</b> Seizures                         |                                                                                                                          |                        |
|    | Periconception          | 39 weeks             | HC: 34 (53.4)                            |                                                         | <b>Eye/vision:</b> Not available                                                     |                                                                                                                          |                        |
| 24 | No ZIKV testing results | Male<br>Live birth   | Weight: 3000 (27.2)<br>Length: 49 (43.0) | Not available                                           | <b>Hearing:</b> Not available<br><b>Neurologic:</b> microcephaly in infant follow-up | No alerts in developmental screening                                                                                     | Not available          |
|    | Second trimester        | 39 weeks             | HC: Not available                        |                                                         | <b>Eye/vision:</b> Not available                                                     |                                                                                                                          |                        |
| 25 | No ZIKV testing results | Female<br>Live birth | Weight: 2800 (18.9)<br>Length: 49 (58.7) | Not available                                           | <b>Hearing:</b> Not available<br><b>Neurologic:</b> microcephaly in infant follow-up | No alerts in developmental screening                                                                                     | Not available          |
|    | First trimester         | 39 weeks             | HC: 31 (1.62)                            |                                                         | <b>Eye/vision:</b> Not available                                                     |                                                                                                                          |                        |
| 26 | No ZIKV testing results | Female<br>Live birth | Weight: 2100 (0.40)<br>Length: 51 (93.0) | Not available                                           | <b>Hearing:</b> Not available<br><b>Neurologic:</b> Microcephaly                     | No alerts in developmental screening                                                                                     | SGA                    |
|    | Second trimester        | 40 weeks             | HC: not available                        |                                                         | <b>Eye/vision:</b> Not available                                                     | Gross motor alert (6-11 & 18-24 months)                                                                                  |                        |
| 27 | No ZIKV testing results | Male<br>Live birth   | Weight: 2500 (1.44)<br>Length: 49 (28.2) | Not available                                           | <b>Hearing:</b> Not available<br><b>Neurologic:</b> Microcephaly in infant follow-up | Fine motor alert (18-24 months)<br>Personal and social alert (18-24 months)<br>Hearing and language alert (18-24 months) | SGA                    |
|    | Second trimester        | 37 weeks             | HC: 37 (99.9)                            |                                                         | <b>Eye/vision:</b> Not available                                                     |                                                                                                                          |                        |
| 28 | No ZIKV testing results | Female<br>Live birth | Weight: 3020 (71.3)<br>Length: 47 (43.1) | <b>Prenatal US:</b> hydrocephaly                        | <b>Hearing:</b> Not available<br><b>Neurologic:</b> Not available                    | Not available                                                                                                            | No additional findings |
|    | Third trimester         | 38 weeks             | HC: not available                        |                                                         | <b>Eye/vision:</b> Not available                                                     |                                                                                                                          |                        |
| 29 | No ZIKV testing results | Female<br>Live birth | Weight: 3475 (88.8)<br>Length: 46 (11.3) | Not available                                           | <b>Hearing:</b> Not available<br><b>Neurologic:</b> Microcephaly in infant follow-up | No alerts in developmental screening                                                                                     | No additional findings |
|    | First trimester         | 37 weeks             | HC: 30 (0.83)                            |                                                         | <b>Eye/vision:</b> Not available                                                     |                                                                                                                          |                        |
| 30 | No ZIKV testing results | Male<br>Live birth   |                                          | Not available                                           | <b>Hearing:</b> Not available                                                        | No alerts in developmental screening                                                                                     | No additional findings |



|    |                                           |                                |                                                                                                                                                                 |                                                                                                                                                                                                           |                                                                                                                                     |                                      |                                          |                                    |
|----|-------------------------------------------|--------------------------------|-----------------------------------------------------------------------------------------------------------------------------------------------------------------|-----------------------------------------------------------------------------------------------------------------------------------------------------------------------------------------------------------|-------------------------------------------------------------------------------------------------------------------------------------|--------------------------------------|------------------------------------------|------------------------------------|
|    |                                           |                                | Weight: 3085<br>(67.8)                                                                                                                                          |                                                                                                                                                                                                           |                                                                                                                                     |                                      |                                          | <b>Neurologic:</b><br>Microcephaly |
|    |                                           |                                | Length: 49<br>(74.7)                                                                                                                                            |                                                                                                                                                                                                           |                                                                                                                                     |                                      |                                          |                                    |
| 31 | Periconception                            | 40 weeks                       | HC: 31<br>(0.68)                                                                                                                                                | <b>Eye/vision:</b> Not available                                                                                                                                                                          |                                                                                                                                     |                                      |                                          |                                    |
|    | No ZIKV testing results                   | Female<br>Live birth           | Weight: 2890<br>(16.2)                                                                                                                                          | <b>Prenatal US:</b><br>normal                                                                                                                                                                             | <b>Hearing:</b> Not available                                                                                                       | Gross motor alert (6-11 months)      | No additional findings                   |                                    |
|    |                                           |                                | Length: 45<br>(0.68)                                                                                                                                            | <b>Neurologic:</b><br>Microcephaly at birth and in infant follow-up                                                                                                                                       |                                                                                                                                     |                                      |                                          |                                    |
| 32 | Second trimester                          | 38 weeks                       | HC: 31<br>(2.06)                                                                                                                                                | <b>Prenatal US:</b><br>Intracardiac echogenic spot, otherwise normal                                                                                                                                      | <b>Eye/vision:</b> Not available                                                                                                    |                                      |                                          |                                    |
|    | Confirmed ZIKV infection                  | Male<br>Live birth             | Weight: 2597<br>(11.2)                                                                                                                                          |                                                                                                                                                                                                           | <b>Hearing:</b> Not available                                                                                                       | No alerts in developmental screening | No additional findings                   |                                    |
|    |                                           |                                | Length: 45<br>(2.32)                                                                                                                                            | <b>Cranial US:</b><br>Normal                                                                                                                                                                              | <b>Neurologic:</b><br>Microcephaly at birth                                                                                         |                                      |                                          |                                    |
|    |                                           |                                | <b>Prenatal Ultrasound:</b><br>Hypoplasia of nasal bone                                                                                                         |                                                                                                                                                                                                           |                                                                                                                                     |                                      |                                          |                                    |
|    |                                           |                                | <b>Cranial US:</b><br>Microcephaly, subcortical calcifications, cerebral and cerebellar abnormality, hydrocephalus                                              |                                                                                                                                                                                                           |                                                                                                                                     |                                      |                                          |                                    |
| 33 | First trimester                           |                                | HC: 29<br>(0.10)                                                                                                                                                | <b>Cranial CT:</b><br>Cerebral, basal ganglia, brain stem and cerebellar atrophy, subcortical calcifications, communicating hydrocephaly, cerebral and cerebellar hypoplasia, and cerebral hypogyratation | <b>Eye/vision:</b> Bilateral red spot in retina, bilateral chorioretinitis, vision impairment                                       |                                      |                                          |                                    |
|    | No laboratory evidence for ZIKV infection | 37 weeks<br>Male<br>Live birth | Weight: 3240<br>(79.4)                                                                                                                                          |                                                                                                                                                                                                           | <b>Hearing:</b> Not available                                                                                                       | Personal social alert (18-24 months) | Dysmorphic facial features, low set ears |                                    |
|    |                                           |                                | Length: 47<br>(32.0)                                                                                                                                            |                                                                                                                                                                                                           | <b>Neurologic:</b><br>Microcephaly at birth and in infant follow-up, seizures, tone, movement and movement swallowing abnormalities |                                      |                                          |                                    |
|    |                                           |                                | <b>Brain MRI:</b><br>cerebellar atrophy, non-communicating hydrocephalus, thinning of both hemispheres of the brain, smooth appearance of the cortical grooves, |                                                                                                                                                                                                           |                                                                                                                                     |                                      |                                          |                                    |

|    |                                                              |                                                   |                                                                     |                                                                                                                                                                                                                    |                                                                                                                                |                                                                                                                  |                          |  |
|----|--------------------------------------------------------------|---------------------------------------------------|---------------------------------------------------------------------|--------------------------------------------------------------------------------------------------------------------------------------------------------------------------------------------------------------------|--------------------------------------------------------------------------------------------------------------------------------|------------------------------------------------------------------------------------------------------------------|--------------------------|--|
|    |                                                              |                                                   |                                                                     |                                                                                                                                                                                                                    | thalamic and brain stem hypoplasia                                                                                             |                                                                                                                  |                          |  |
| 34 | Second trimester<br>No laboratory evidence of ZIKV infection | 37 weeks<br>Female<br>Live birth                  | HC: not available<br>Weight: 2094 (2.73)<br>Length: 44 (2.98)       | <b>Prenatal US:</b><br>Bilateral ventriculomegaly, agenesis of corpus callosum, cortical calcifications<br><b>Brain MRI:</b><br>dysgenesis of corpus callosum, posterior horn dilatation, absent septum pellucidum | <b>Eye/vision:</b> Not available<br><b>Hearing:</b> Not available<br><b>Neurologic:</b><br>Microcephaly, swallowing difficulty | Gross motor alert (12-17 months)<br>Fine motor alert (12-17 months)<br>Hearing and language alert (12-17 months) | SGA                      |  |
| 35 | First trimester<br>No ZIKV testing results                   | 20 weeks<br>Fetal sex not available<br>Fetal loss | HC: not available<br>Weight: not available<br>Length: not available | <b>Prenatal US:</b><br>Ventriculomegaly, hypoplasia of vermis, absent midline brain structures.<br>Microcephaly.<br>Arthrogryposis                                                                                 | <b>Eye/vision:</b> Not available<br><b>Hearing:</b> Not available<br><b>Neurologic:</b><br>Not available                       | Not available                                                                                                    | Not available            |  |
| 36 | Second Trimester<br>No ZIKV testing results                  | 39 weeks<br>Male<br>Live birth                    | HC: 31 (0.78)<br>Weight: 2453 (2.51)<br>Length: 49 (43.0)           | <b>Cranial US:</b><br>Normal                                                                                                                                                                                       | <b>Eye/vision:</b> Normal<br><b>Hearing:</b> Normal<br><b>Neurologic:</b><br>Microcephaly, hypotonia                           | No alerts in developmental screening                                                                             | SGA                      |  |
| 37 | Second trimester<br>No ZIKV testing results                  | 38 weeks<br>Female<br>Live birth                  | HC: 30 (0.52)<br>Weight: 2800 (32.0)<br>Length: 51(96.6)            | <b>Cranial US:</b><br>Normal                                                                                                                                                                                       | <b>Eye/vision:</b> Not available<br><b>Hearing:</b> Not available<br><b>Neurologic:</b><br>Microcephaly                        | No alerts in developmental screening                                                                             | No additional findings   |  |
| 38 | Second trimester<br>No ZIKV testing results                  | 39 weeks<br>Female<br>Live birth                  | HC: 32 (9.86)<br>Weight: 2930 (29.9)<br>Length: 48 (34.0)           | Not available                                                                                                                                                                                                      | <b>Eye/vision:</b> Visual impairment<br><b>Hearing:</b> Hearing loss<br><b>Neurologic:</b><br>Microcephaly in infant follow-up | No alerts in developmental screening                                                                             | No additional findings   |  |
| 39 | Second trimester<br>No laboratory evidence of ZIKV infection | 40 weeks<br>Female<br>Live birth                  | HC: 31 (0.68)<br>Weight: 3735 (87.2)<br>Length: 50 (69.1)           | <b>Prenatal US:</b><br>Normal<br><b>Cranial US:</b><br>Normal<br><b>Brain MRI:</b><br>Normal<br><b>Spinal MRI:</b><br>ependymal                                                                                    | <b>Eye/vision:</b> Normal<br><b>Hearing:</b> Normal<br><b>Neurologic:</b><br>Microcephaly                                      | No alerts in developmental screening                                                                             | Hyperlaxity of ligaments |  |

|    |                                                                    |                                  |                                                                           |                                                                                           |                                                                                                                                      |                                            |                                             |
|----|--------------------------------------------------------------------|----------------------------------|---------------------------------------------------------------------------|-------------------------------------------------------------------------------------------|--------------------------------------------------------------------------------------------------------------------------------------|--------------------------------------------|---------------------------------------------|
|    |                                                                    |                                  |                                                                           | tubular<br>dilation at the<br>level of the<br>medullar cone,<br>probable<br>syringomyelia |                                                                                                                                      |                                            |                                             |
| 40 | First trimester<br>Confirmed ZIKV<br>infection                     | 41 weeks<br>Female<br>Live birth | HC: 32<br>(2.56)<br>Weight: 3305<br>(43.2)<br>Length: 51<br>(79.4)        | <b>Prenatal US:</b><br>talipes<br>equinovarus                                             | <b>Eye/vision:</b> Not<br>available<br><b>Hearing:</b> Not available<br><b>Neurologic:</b><br>Microcephaly                           | Not available                              | Not available                               |
| 41 | Periconception<br>No ZIKV testing<br>results                       | 38 weeks<br>Male<br>Live birth   | HC: 31<br>(2.06)<br>Weight: 2490<br>(6.95)<br>Length: 43<br>(0.20)        | <b>Prenatal US:</b><br>Normal                                                             | <b>Eye/vision:</b> Bilateral<br>strabismus<br><b>Hearing:</b> Not available<br><b>Neurologic:</b><br>Microcephaly                    | No alerts in<br>developmental<br>screening | Umbilical hernia,<br>asymmetric ears<br>SGA |
| 42 | Second Trimester<br>No laboratory<br>evidence of ZIKV<br>infection | 39 weeks<br>Female<br>Live birth | HC: 31<br>(3.75) (1.62)<br>Weight: 2747<br>(15.3)<br>Length: 49<br>(58.7) | <b>Prenatal US:</b><br>Normal<br><b>Cranial US:</b><br>Normal                             | <b>Eye/vision:</b> Not<br>available<br><b>Hearing:</b> Not available<br><b>Neurologic:</b><br>Microcephaly at birth<br>and follow up | No alerts in<br>developmental<br>screening | No additional findings                      |
| 43 | Second Trimester<br>No ZIKV testing<br>results                     | 40 weeks<br>Female<br>Live birth | HC: 31<br>(0.68)<br>Weight: 2327<br>(0.79)<br>Length: 46<br>(2.58)        | Not available                                                                             | <b>Eye/vision:</b> Not<br>available<br><b>Hearing:</b> Not available<br><b>Neurologic:</b><br>Microcephaly                           | Not available                              | SGA                                         |
| 44 | Second Trimester<br>Confirmed ZIKV<br>infection                    | 40 weeks<br>Male<br>Live birth   | HC: 30<br>(0.03)<br>Weight: 2655<br>(3.35)<br>Length: 50<br>(51.9)        | <b>Cranial US:</b><br>Normal                                                              | <b>Eye/vision:</b> Not<br>available<br><b>Hearing:</b> Not available<br><b>Neurologic:</b><br>Microcephaly                           | Not available                              | SGA                                         |
| 45 | First trimester<br>Presumptive<br>ZIKV infection                   | 25 weeks<br>Male<br>Live birth   | HC: 26<br>(96.22)<br>Weight: 940<br>(90.6)<br>Length: 34<br>(57.9)        | <b>Cranial US:</b><br>Normal                                                              | <b>Eye/vision:</b> Right<br>cataract<br><b>Hearing:</b> Normal<br><b>Neurologic:</b> Hypotonia                                       | No alerts in<br>developmental<br>screening | Flat nasal bridge, broad<br>forehead        |
| 46 | First trimester<br>No ZIKV testing<br>results                      | 35 weeks<br>Male<br>Live birth   | HC: 29<br>(1.14)<br>Weight: 2270<br>(31.1)<br>Length: 45<br>(29.4)        | Not available                                                                             | <b>Eye/vision:</b> Not<br>available<br><b>Hearing:</b> Not available<br><b>Neurologic:</b><br>Microcephaly                           | Not available                              | Not available                               |

|    |                                                                   |                                  |                        |                                                                                                                                                                             |                                                                                                |                                                                 |                                                                                                                                         |
|----|-------------------------------------------------------------------|----------------------------------|------------------------|-----------------------------------------------------------------------------------------------------------------------------------------------------------------------------|------------------------------------------------------------------------------------------------|-----------------------------------------------------------------|-----------------------------------------------------------------------------------------------------------------------------------------|
| 47 | Third trimester<br>Presumptive<br>ZIKV infection                  | 40 weeks<br>Female<br>Live birth | HC: 30<br>(0.07)       | <b>Prenatal US:</b><br>Microcephaly                                                                                                                                         | <b>Eye/vision:</b> abnormal<br>visual evoked<br>potentials                                     | Gross motor alert (12-<br>17 months)                            | Varus feet, narrow<br>forehead, high arched<br>palate, micrognathia, hip<br>dysplasia                                                   |
|    |                                                                   |                                  | Weight: 2790<br>(10.5) | <b>Cranial CT:</b><br>craniofacial<br>disproportion,<br>reduced brain<br>volume,<br>overlapped<br>sutures.<br>Cortico-<br>subcortical<br>calcification in<br>frontal lobes. |                                                                                                |                                                                 |                                                                                                                                         |
|    |                                                                   |                                  | Length: 48<br>(21.8)   | <b>Cranial US:</b><br>Normal                                                                                                                                                | <b>Hearing:</b> Normal                                                                         | Hearing and language<br>alert (12-17 months)                    | SGA                                                                                                                                     |
| 48 | First trimester<br>No ZIKV testing<br>results                     | 37 weeks<br>Female<br>Live birth | HC: not<br>available   | <b>Prenatal US:</b><br>Normal                                                                                                                                               | <b>Eye/vision:</b> Normal                                                                      | Gross motor alert (6-11<br>& 12-17 months)                      | Micrognathia, flat nasal<br>bridge, low set ears,<br>smooth and short<br>philtrum, sacral dimple,<br>hypopigmented lesions on<br>thorax |
|    |                                                                   |                                  | Weight: 2005<br>(1.59) | <b>Cranial US:</b><br>Intracranial<br>calcifications.                                                                                                                       |                                                                                                |                                                                 |                                                                                                                                         |
|    |                                                                   |                                  | Length: 45<br>(8.93)   | <b>Cranial CT:</b><br>normal<br>ventricles,<br>periventricular<br>calcifications                                                                                            | <b>Hearing:</b> Normal                                                                         |                                                                 |                                                                                                                                         |
|    |                                                                   |                                  |                        |                                                                                                                                                                             | <b>Neurologic:</b><br>Tone and movement<br>abnormality                                         |                                                                 | SGA                                                                                                                                     |
| 49 | Second trimester<br>No ZIKV testing<br>results                    | 35 weeks<br>Female<br>Live birth | HC: 44<br>(100)        | <b>Prenatal US:</b><br>Hydrocephaly,<br>polyhydramnio<br>s,                                                                                                                 | <b>Eye/vision:</b> Not<br>available                                                            | Not available                                                   | Cleft palate, right talipes<br>equinovarus                                                                                              |
|    |                                                                   |                                  | Weight: 2820<br>(86.9) | <b>Cranial US:</b><br>Absent corpus<br>callosum,<br>cerebral<br>atrophy,<br>ventriculomega<br>ly/hydrocephal<br>y                                                           |                                                                                                |                                                                 |                                                                                                                                         |
|    |                                                                   |                                  | Length: 43<br>(7.47)   |                                                                                                                                                                             | <b>Hearing:</b> Not available                                                                  |                                                                 |                                                                                                                                         |
|    |                                                                   |                                  |                        |                                                                                                                                                                             | <b>Neurologic:</b> Tone and<br>movement<br>abnormalities                                       |                                                                 | Infant died at 3 days of age                                                                                                            |
| 50 | First trimester<br>No ZIKV testing<br>results                     | 36 weeks<br>Male<br>Live birth   | HC: 33<br>(64.4)       | Not available                                                                                                                                                               | <b>Eye/vision:</b> Not<br>available                                                            | No alerts in<br>developmental<br>screening                      | Bilateral hydronephrosis                                                                                                                |
|    |                                                                   |                                  | Weight: 3090<br>(82.5) |                                                                                                                                                                             |                                                                                                |                                                                 |                                                                                                                                         |
|    |                                                                   |                                  | Length: 52<br>(99.3)   |                                                                                                                                                                             | <b>Hearing:</b> Not available                                                                  |                                                                 |                                                                                                                                         |
|    |                                                                   |                                  |                        |                                                                                                                                                                             | <b>Neurologic:</b><br>microcephaly in infant<br>follow-up                                      |                                                                 |                                                                                                                                         |
| 51 | First trimester<br>No laboratory<br>evidence of ZIKV<br>infection | 37 weeks<br>Male<br>Live birth   | HC: 29<br>(0.10)       | <b>Prenatal US:</b><br>Ventriculomeg<br>aly,<br>microcephaly                                                                                                                | <b>Eye/vision:</b> Macular<br>hypopigmentation,<br>chorioretinal atrophy,<br>vision impairment | Gross motor alert (6-11,<br>12-17, & 18-24 months)              | SGA                                                                                                                                     |
|    |                                                                   |                                  | Weight: 2330<br>(7.78) | <b>Cranial CT:</b><br>Severe<br>microcephaly,<br>intracranial<br>calcification,<br>cerebral, brain                                                                          |                                                                                                |                                                                 |                                                                                                                                         |
|    |                                                                   |                                  | Length: 46<br>(15.3)   |                                                                                                                                                                             | <b>Hearing:</b> Not available                                                                  | Fine motor alert (6-11,<br>12-17, & 18-24 months)               |                                                                                                                                         |
|    |                                                                   |                                  |                        |                                                                                                                                                                             | <b>Neurologic:</b><br>Microcephaly, seizures,<br>tone abnormality,<br>movement                 | Hearing and language<br>alert (6-11, 12-17, & 18-<br>24 months) |                                                                                                                                         |

|    |                                          |                      |                                          | stem, cerebellar atrophy                                                                                                                                 | abnormality, , swallowing difficulty                                                                                                         | Personal and social alert (6-11, 12-17, & 18-24 months)                                                |                        |
|----|------------------------------------------|----------------------|------------------------------------------|----------------------------------------------------------------------------------------------------------------------------------------------------------|----------------------------------------------------------------------------------------------------------------------------------------------|--------------------------------------------------------------------------------------------------------|------------------------|
| 52 | Periconception                           | 38 weeks             | HC: 33 (49.1)                            | <b>Prenatal US:</b> microcephaly                                                                                                                         | <b>Eye/vision:</b> Normal                                                                                                                    |                                                                                                        | No additional findings |
|    | No laboratory evidence of ZIKV infection | Female<br>Live birth | Weight: 3090 (61.6)<br>Length: 51 (95.5) |                                                                                                                                                          | <b>Hearing:</b> Not available                                                                                                                | No alerts in developmental screening                                                                   |                        |
| 53 | Second trimester                         | 40 weeks             | HC: 34 (39.2)                            | Not available                                                                                                                                            | <b>Eye/vision:</b> chorioretinal atrophy, vision impairment                                                                                  |                                                                                                        | No additional findings |
|    | No ZIKV testing results                  | Male<br>Live birth   | Weight: 3380 (49.6)<br>Length: 53 (96.5) |                                                                                                                                                          | <b>Hearing:</b> normal                                                                                                                       | No alerts in developmental screening                                                                   |                        |
| 54 | First trimester                          | 38 weeks             | HC: 29 (0.03)                            | <b>Cranial CT:</b> Microcephaly, ventriculomegaly, cortical atrophy, corpus callosum abnormality, large cisterna magna, abnormal cortical gyral patterns | <b>Eye/vision:</b> Abnormal pigment epithelium. Vision impairment.                                                                           |                                                                                                        | SGA                    |
|    | Presumptive ZIKV infection               | Male<br>Live birth   | Weight: 2450 (5.75)<br>Length: 47 (17.6) |                                                                                                                                                          | <b>Hearing:</b> hearing loss                                                                                                                 | Gross motor alert (6-11 & 18-24 months)<br>Fine motor alert (0-5, 6-11, & 18-24 months)                |                        |
| 55 | Third trimester                          | 37 weeks             | HC: 29 (0.10)                            | <b>Prenatal US:</b> Microcephaly, intracranial calcifications, ventriculomegaly                                                                          | <b>Eye/vision:</b> Abnormal retinal pigment epithelium. Vision impairment                                                                    |                                                                                                        | SGA                    |
|    | No ZIKV testing results                  | Male<br>Live birth   | Weight: 2380 (9.73)<br>Length: 48 (54.0) |                                                                                                                                                          | <b>Hearing:</b> Normal                                                                                                                       | Gross motor alert (0-5, 6-11, 12-17, & 18-24 months)<br>Fine motor alert (6-11, 12-17, & 18-24 months) |                        |
|    |                                          |                      |                                          | <b>Brain MRI:</b> Pachygyria, cerebral atrophy,                                                                                                          | <b>Neurologic:</b> Microcephaly at birth and in infant follow-up, seizures, increased body tone, swallowing difficulty, movement abnormality |                                                                                                        |                        |

|    |                                          |                                |                                                            |                                                                                                                                                |                                                                                                                                       |                                                                                                              |                                                                            |
|----|------------------------------------------|--------------------------------|------------------------------------------------------------|------------------------------------------------------------------------------------------------------------------------------------------------|---------------------------------------------------------------------------------------------------------------------------------------|--------------------------------------------------------------------------------------------------------------|----------------------------------------------------------------------------|
|    |                                          |                                | dysgenesis of corpus callosum, ex vacuo hydrocephaly       |                                                                                                                                                |                                                                                                                                       |                                                                                                              |                                                                            |
| 56 | First trimester                          | 38 weeks                       | HC: 35 (89.4)                                              | <b>Cranial US:</b> Normal                                                                                                                      | <b>Eye/vision:</b> Normal                                                                                                             | Hearing and language alert (0-5 & 18-24 months)                                                              | No additional findings                                                     |
|    | No ZIKV testing results                  | Male                           | Weight: 3280 (68.9)                                        | <b>Brain MRI:</b> Ventriculomegaly                                                                                                             | <b>Hearing:</b> Normal                                                                                                                |                                                                                                              |                                                                            |
|    |                                          | Livebirth                      | Length: 52 (97.0)                                          |                                                                                                                                                | <b>Neurologic:</b> Normal                                                                                                             |                                                                                                              |                                                                            |
| 57 | First trimester                          | 39 weeks                       | HC: 32 (9.86)                                              | <b>Cranial US:</b> Normal                                                                                                                      | <b>Eye/vision:</b> Abnormal retinal pigment epithelium. visual impairment                                                             | No alerts in developmental screening                                                                         | SGA                                                                        |
|    | No ZIKV testing results                  | Female                         | Weight: 2249 (1.05)                                        |                                                                                                                                                | <b>Hearing:</b> normal                                                                                                                |                                                                                                              | Craniofacial disproportion                                                 |
|    |                                          | Livebirth                      | Length: 47 (15.3)                                          |                                                                                                                                                | <b>Neurologic:</b> microcephaly in infant follow-up                                                                                   |                                                                                                              | High arched palate<br>Low set ears<br>Micrognathia<br>Redundant scalp skin |
| 58 | First trimester                          | 40 weeks                       | HC: 32 (2.27)                                              | Not available                                                                                                                                  | <b>Eye/vision:</b> Not available                                                                                                      | Not available                                                                                                | SGA                                                                        |
|    | No laboratory evidence of ZIKV infection | Male<br>Live birth             | Weight: 2800 (6.88)                                        |                                                                                                                                                | <b>Hearing:</b> Not available                                                                                                         |                                                                                                              |                                                                            |
|    |                                          |                                | Length: 48 (11.9)                                          |                                                                                                                                                | <b>Neurologic:</b> Microcephaly                                                                                                       |                                                                                                              |                                                                            |
| 59 | First trimester                          |                                |                                                            | <b>Cranial US:</b> Normal findings                                                                                                             |                                                                                                                                       |                                                                                                              |                                                                            |
|    | No laboratory evidence of ZIKV infection | 36 weeks<br>Male<br>Live birth | HC: 35 (96.91)<br>Weight: 2900 (69.2)<br>Length: 50 (94.4) | <b>Cranial CT:</b> Increased sub-arachnoid space at the level of the frontal lobes.<br><b>Brain MRI:</b> Frontal and parietal cortical atrophy | <b>Eye/vision:</b> Normal<br><b>Hearing:</b> Hearing loss<br><b>Neurologic:</b> Seizures, body tone abnormality, movement abnormality | Gross motor alert (6-11 months)<br>Fine motor alert (6-11 months)<br>Hearing and language alert (0-5 months) | Bilateral coxa valga<br>Broad forehead                                     |
| 60 | Periconception                           | 34 weeks                       | HC: 31 (36.1)                                              | Not available                                                                                                                                  | <b>Eye/vision:</b> Normal                                                                                                             | No alerts in developmental screening                                                                         | SGA                                                                        |
|    | No ZIKV testing results                  | Male<br>Live birth             | Weight: 1610 (6.4)                                         |                                                                                                                                                | <b>Hearing:</b> Not available                                                                                                         |                                                                                                              |                                                                            |
|    |                                          |                                | Length: 42 (7.24)                                          |                                                                                                                                                | <b>Neurologic:</b> microcephaly in infant follow-up                                                                                   |                                                                                                              |                                                                            |
| 61 | First trimester                          | 39 weeks                       | HC: 35 (82.3)                                              | Not available                                                                                                                                  | <b>Eye/vision:</b> Not available                                                                                                      | No alerts in developmental screening                                                                         | No additional findings                                                     |
|    | No laboratory evidence of ZIKV infection | Male<br>Live birth             | Weight: 3640 (82.8)                                        |                                                                                                                                                | <b>Hearing:</b> Not available                                                                                                         |                                                                                                              |                                                                            |
|    |                                          |                                | Length: 51 (84.6)                                          |                                                                                                                                                | <b>Neurologic:</b> microcephaly in infant follow-up                                                                                   |                                                                                                              |                                                                            |

|    |                                             |                                  |                                          |                                                                                                                                                |                                                                                                                                                 |                                                                                                                                                                       |                                                                              |
|----|---------------------------------------------|----------------------------------|------------------------------------------|------------------------------------------------------------------------------------------------------------------------------------------------|-------------------------------------------------------------------------------------------------------------------------------------------------|-----------------------------------------------------------------------------------------------------------------------------------------------------------------------|------------------------------------------------------------------------------|
| 62 | First trimester<br>No ZIKV testing results  | 38 weeks<br>Male<br>Live birth   | HC: 33 (34.5)                            | <b>Cranial US:</b><br>Parenchymal ischemic lesions                                                                                             | <b>Eye/vision:</b> Abnormal retinal pigment epithelium Pale optic nerves,                                                                       | Gross motor alert (6-11 & 12-17 months)                                                                                                                               | No additional findings                                                       |
|    |                                             |                                  | Weight: 2900 (32.9)<br>Length: 55 (99.9) | <b>Cranial CT:</b><br>Vascular lesion that could be hemorrhage or ischemia in the midline<br><b>Brain MRI:</b><br>Periventricular leukomalacia | <b>Hearing:</b> Normal<br><b>Neurologic:</b><br>Microcephaly in infant follow-up, tone and movement abnormality                                 | Fine motor alert (6-11, 12-17, & >24 months)<br>Hearing and language alert (6-11, 12-17, & >24 months)<br>Personal and social alert (6-11, 12-17, & >24 months)       |                                                                              |
| 63 | First trimester<br>No ZIKV testing results  | 39 weeks<br>Female<br>Live birth | HC: 34 (70.2)                            | Not available                                                                                                                                  | <b>Eye/vision:</b> Normal                                                                                                                       | No alerts in developmental screening                                                                                                                                  | No additional findings                                                       |
|    |                                             |                                  | Weight: 2730 (14.2)<br>Length: 50 (80.4) |                                                                                                                                                | <b>Hearing:</b> Normal<br><b>Neurologic:</b><br>Microcephaly in infant follow-up                                                                |                                                                                                                                                                       |                                                                              |
| 64 | First trimester<br>No ZIKV testing results  | 38 weeks<br>Male<br>Live birth   | HC: 31 (2.06)                            | <b>Cranial US:</b><br>Normal                                                                                                                   | <b>Eye/vision:</b> Not available                                                                                                                | No alerts in developmental screening                                                                                                                                  | Not available                                                                |
|    |                                             |                                  | Weight: 2650 (13.9)<br>Length: 50 (79.4) |                                                                                                                                                | <b>Hearing:</b> Not available<br><b>Neurologic:</b><br>Microcephaly at birth                                                                    |                                                                                                                                                                       |                                                                              |
| 65 | First trimester<br>No ZIKV testing results  | 37 weeks<br>Female<br>Live birth | HC: 32 (29.88)                           | <b>Cranial US:</b><br>No visualization of the corpus callosum, large occipital horns                                                           | <b>Eye/vision:</b> Strabismus                                                                                                                   | Gross motor alert (6-11, 12-17, & 18-24 months)                                                                                                                       | Nasal deviation to the left                                                  |
|    |                                             |                                  | Weight: 2700 (39.5)<br>Length: 47 (43.1) | <b>Cranial CT:</b><br>Intracranial calcifications, mild ventriculomegaly                                                                       | <b>Hearing:</b> Normal<br><b>Neurologic:</b><br>microcephaly in infant follow-up, tone abnormality, movement abnormality, swallowing difficulty | Fine motor alert (6-11, 12-17, & 18-24 months)<br>Hearing and language alert (6-11, 12-17, & 18-24 months)<br>Personal and social alert (6-11, 12-17, & 18-24 months) |                                                                              |
| 66 | Second Trimester<br>No ZIKV testing results | 39 weeks<br>Female<br>Live birth | HC: 35 (91.68)                           | <b>Cranial US:</b><br>Normal                                                                                                                   | <b>Eye/vision:</b> Left enophthalmos, right congenital cataract, presumptive staphyloma                                                         | Not available                                                                                                                                                         | Persistent ductus arteriosus, anterior anus, enlarged clitoris, low set ears |
|    |                                             |                                  | Weight: 3000 (36.8)<br>Length: 48 (34.0) |                                                                                                                                                | <b>Hearing:</b> Not available<br><b>Neurologic:</b> Not available                                                                               |                                                                                                                                                                       | Infant death at 5 months of age                                              |
| 67 | First trimester<br>No ZIKV testing results  | 33 weeks<br>Male<br>Live birth   | HC: 25 (0.01)                            | <b>Prenatal US:</b><br>Suspected aneuploidy, microcephaly, polyhydramnios                                                                      | <b>Eye/vision:</b> Not available                                                                                                                | Not available                                                                                                                                                         | SGA                                                                          |
|    |                                             |                                  | Weight: 980 (1.00)<br>Length: 35 (0.03)  |                                                                                                                                                | <b>Hearing:</b> Not available<br><b>Neurologic:</b><br>Microcephaly, congenital contractures, bilateral talipes equinovarus                     |                                                                                                                                                                       | Infant died 1 minute after birth                                             |

\*Percentiles for weight, length and head circumference at birth based on INTERGROWTH 21<sup>st</sup> standards (32)

†Brain anomaly described as holoprosencephaly, but insufficient information from imaging or clinical examination to confirm diagnosis.

SGA, small for gestational age (defined as <10<sup>th</sup> percentile of birth weight by gestational age and sex using INTERGROWTH 21<sup>st</sup> standards) (32)

**Table S3.** Characteristics among pregnant women with complete pregnancy outcome data, comparing those with any Zika virus laboratory testing results, and those with no Zika virus laboratory testing results, Project *Vigilancia de Embarazadas con Zika* (VEZ), Colombia, 2016 – 2018.

|                                           | Total (N =<br>1180)<br>N (%) | Pregnant women with<br>testing results (N =5<br>69)<br>N (%) | Pregnant women<br>without testing<br>results (N = 611)<br>N (%) | Chi-Sq p-<br>value |
|-------------------------------------------|------------------------------|--------------------------------------------------------------|-----------------------------------------------------------------|--------------------|
| <b>Zika virus laboratory testing</b>      |                              |                                                              |                                                                 |                    |
| Positive                                  | 254 (21.5)                   | 254 (44.6)                                                   | Not applicable                                                  | Not applicable     |
| Confirmed*                                | 220 (86.6)                   | 220 (86.6)                                                   | Not applicable                                                  |                    |
| Presumptive*                              | 34 (13.4)                    | 34 (13.4)                                                    | Not applicable                                                  |                    |
| Negative                                  | 315 (26.7)                   | 315 (55.4)                                                   | Not applicable                                                  |                    |
| <b>Maternal age at conception (years)</b> |                              |                                                              |                                                                 |                    |
|                                           |                              |                                                              |                                                                 | 0.1830             |
| <17                                       | 106 (9.0)                    | 51 (9.0)                                                     | 55 (9.0)                                                        |                    |
| 17-19                                     | 208 (17.6)                   | 93 (16.3)                                                    | 115 (18.8)                                                      |                    |
| 20-24                                     | 374 (31.7)                   | 181 (31.8)                                                   | 193 (31.6)                                                      |                    |
| 25-29                                     | 249 (21.1)                   | 120 (21.1)                                                   | 129 (21.1)                                                      |                    |
| 30-34                                     | 149 (12.6)                   | 76 (13.4)                                                    | 73 (12.0)                                                       |                    |
| ≥35                                       | 78 (6.6)                     | 35 (6.2)                                                     | 43 (7.0)                                                        |                    |
| Not reported                              | 16 (1.4)                     | 13 (2.3)                                                     | 3 (0.5)                                                         |                    |
| <b>Maternal education</b>                 |                              |                                                              |                                                                 |                    |
|                                           |                              |                                                              |                                                                 | 0.0002             |
| < Secondary                               | 120 (10.2)                   | 60 (10.5)                                                    | 60 (9.8)                                                        |                    |
| Secondary                                 | 595 (50.4)                   | 269 (47.3)                                                   | 326 (53.4)                                                      |                    |
| Technical                                 | 130 (11.0)                   | 48 (8.4)                                                     | 82 (13.4)                                                       |                    |
| Professional                              | 70 (5.9)                     | 35 (6.2)                                                     | 35 (5.7)                                                        |                    |
| Not reported                              | 265 (22.5)                   | 157 (27.6)                                                   | 108 (17.7)                                                      |                    |
| <b>Gravidity</b>                          |                              |                                                              |                                                                 |                    |
|                                           |                              |                                                              |                                                                 | <0.0001            |
| Primigravid                               | 323 (27.4)                   | 190 (33.4)                                                   | 133 (21.8)                                                      |                    |
| Multigravid                               | 668 (56.6)                   | 298 (52.4)                                                   | 370 (60.6)                                                      |                    |
| <b>Delivery method</b>                    |                              |                                                              |                                                                 |                    |
|                                           |                              |                                                              |                                                                 | 0.0204             |
| Vaginal                                   | 541 (45.9)                   | 282 (49.6)                                                   | 259 (42.4)                                                      |                    |
| Caesarean section                         | 622 (52.7)                   | 282 (49.6)                                                   | 340 (55.7)                                                      |                    |



|                                                                    |             |            |            |        |
|--------------------------------------------------------------------|-------------|------------|------------|--------|
| Not reported                                                       | 17 (1.4)    | 5 (0.9)    | 12 (2.0)   |        |
| <b>Infant sex**</b>                                                |             |            |            | 0.2728 |
| Male                                                               | 576 (48.1)  | 273 (47.5) | 303 (48.7) |        |
| Female                                                             | 603 (50.4)  | 290 (50.4) | 313 (50.3) |        |
| Not reported                                                       | 18 (1.5)    | 12 (2.1)   | 6 (1.0)    |        |
| <b>Plurality</b>                                                   |             |            |            | 0.1715 |
| Singleton                                                          | 1150 (97.5) | 553 (97.2) | 597 (97.7) |        |
| Twins                                                              | 12 (1.0)    | 4 (0.7)    | 8 (1.3)    |        |
| Not reported                                                       | 18 (1.5)    | 12 (2.1)   | 6 (1.0)    |        |
| <b>Symptoms reported‡</b>                                          |             |            |            |        |
| Rash                                                               | 983 (83.3)  | 471 (82.8) | 512 (83.8) | 0.6387 |
| Fever                                                              | 787 (66.7)  | 358 (62.9) | 429 (70.2) | 0.0079 |
| Joint pain                                                         | 691 (58.6)  | 336 (59.1) | 355 (58.1) | 0.7408 |
| Headache                                                           | 612 (51.9)  | 277 (48.7) | 335 (54.8) | 0.0347 |
| Conjunctivitis                                                     | 267 (22.6)  | 124 (21.8) | 143 (23.4) | 0.5085 |
| Eye pain                                                           | 116 (9.8)   | 58 (10.2)  | 58 (9.5)   | 0.6862 |
| Diarrhea                                                           | 99 (8.4)    | 50 (8.8)   | 49 (8.0)   | 0.6411 |
| Swollen lymph nodes                                                | 22 (1.9)    | 11 (1.9)   | 11 (1.8)   | 0.8661 |
| Not reported                                                       | 72 (6.1)    | 39 (6.9)   | 33 (5.4)   | 0.2974 |
| <b>Trimester of symptom onset</b>                                  |             |            |            | 0.0281 |
| Periconception (up to 8 weeks before estimated date of conception) | 84 (7.1)    | 30 (5.3)   | 54 (8.8)   |        |
| First trimester                                                    | 616 (52.2)  | 314 (55.2) | 302 (49.4) |        |
| Second trimester                                                   | 397 (33.6)  | 189 (33.2) | 208 (34.0) |        |
| Third trimester                                                    | 63 (5.3)    | 24 (4.2)   | 39 (6.4)   |        |
| Not reported                                                       | 20 (1.7)    | 12 (2.1)   | 8 (1.3)    |        |

\*Confirmed: Zika virus nucleic acid amplification testing (NAAT) of maternal serum or urine, amniotic fluid, umbilical cord serum or cord tissue, placental tissue, or fetal tissue was positive, regardless of Zika virus immunoglobulin M (IgM) test results; Presumptive: Zika virus NAAT of maternal serum or urine, amniotic fluid, umbilical cord serum or cord tissue, placental tissue, or fetal tissue was negative or not performed, but maternal or fetal Zika virus IgM test results were positive and dengue virus IgM test results were negative. Of note, the interval between symptom onset and NAAT was often prolonged.

\*\* Overall denominator (n=1,192) includes 1,178 live born infants and 14 pregnancy losses. Denominator for subgroup with laboratory testing results (n=573) includes 564 live born infants and 9 pregnancy losses. Denominator for subgroup without laboratory testing results (n=619) includes 614 live born infants and 5 pregnancy losses

‡ Not mutually exclusive; participants could report more than one symptom.

**Table S4.** Zika virus laboratory testing results, and documentation of samples among those with no Zika virus laboratory testing results, Project *Vigilancia de Embarazadas con Zika* (VEZ), Colombia, 2016 – 2018.

| <b>Pregnant women with Zika virus laboratory testing results (N = 569/1180; 48.2%)</b>                   |              |
|----------------------------------------------------------------------------------------------------------|--------------|
|                                                                                                          | <b>n (%)</b> |
| Positive                                                                                                 | 254 (44.6)   |
| Confirmed*                                                                                               | 220 (86.6)   |
| Presumptive*                                                                                             | 34 (13.4)    |
| Negative                                                                                                 | 315 (55.4)   |
| <b>Pregnant women without Zika virus laboratory testing results (N = 611/1,180; 51.8%)</b>               |              |
|                                                                                                          | <b>n (%)</b> |
| Documentation of sample collected during pregnancy                                                       | 597 (97.7)   |
| Sample collected as part of Project VEZ                                                                  | 184 (30.8)   |
| Documentation of sample collected as part of national surveillance (Sivigila) as noted in medical record | 413 (69.2)   |
| No documentation of sample collected during pregnancy                                                    | 14 (2.3)     |

\*Confirmed: Zika virus nucleic acid amplification testing (NAAT) of maternal serum or urine, amniotic fluid, umbilical cord serum or cord tissue, placental tissue, or fetal tissue was positive, regardless of Zika virus immunoglobulin M (IgM) test results; Presumptive: Zika virus NAAT of maternal serum or urine, amniotic fluid, umbilical cord serum or cord tissue, placental tissue, or fetal tissue was negative or not performed, but maternal or fetal Zika virus IgM test results were positive and dengue virus IgM test results were negative. Of note, the interval between symptom onset and NAAT was often prolonged.
